# Supplementary material for: Unlocking the potential of Ti3C2 electrodes: a data-driven capacitance prediction study
Source: Royal Society of Chemistry journal article supplement (doi:10.1039/d4ya00460d), 2024-01-01
Supplement: d4ya00460d1.pdf [file d4ya00460d1.pdf]

## Supplementary Information

### S1

| Year | DOI                                                                                                           | Remarks | Termination | Material                                            | Capacitance (F/g) | Specific Capacitance (mAh/g) | Volumetric Specific Capacitance (F/cm <sup>3</sup> ) | Specific surface area (m <sup>2</sup> /g) | Percentages of Terminations | Electrolyte Chemical Formula                                                                                                     | Cation ion mobility (cm <sup>2</sup> /Vs) x10 <sup>-4</sup> | Anion ion mobility (cm <sup>2</sup> /Vs) x10 <sup>-4</sup> | Electrolyte Concentration (M) | Scan Rate (mV/s) | Current Density (A/g) | Cell Configuration (three/two electrode system) | Potential Window (V) | Sheet thickness (mm) | Density of sheet (g/cm <sup>3</sup> ) | Intercalation (charge per gram) | wt% Ti3C2 in electrode |        |        |
|------|---------------------------------------------------------------------------------------------------------------|---------|-------------|-----------------------------------------------------|-------------------|------------------------------|------------------------------------------------------|-------------------------------------------|-----------------------------|----------------------------------------------------------------------------------------------------------------------------------|-------------------------------------------------------------|------------------------------------------------------------|-------------------------------|------------------|-----------------------|-------------------------------------------------|----------------------|----------------------|---------------------------------------|---------------------------------|------------------------|--------|--------|
| 2015 | <a href="https://doi.org/10.1007/s40145-015-0143-3">https://doi.org/10.1007/s40145-015-0143-3</a>             |         |             | Ti3C2 exfoliated by HF in KOH                       | 71.2              |                              | 119.8                                                | 22.35                                     |                             | KOH                                                                                                                              | 7.61                                                        | 20.5                                                       | 3                             | 1                | 2.5                   | 2                                               |                      | 0.15                 |                                       |                                 |                        |        |        |
|      |                                                                                                               |         |             |                                                     | 60.4              |                              |                                                      | 22.35                                     |                             | KOH                                                                                                                              | 7.61                                                        | 20.5                                                       | 3                             | 1                | 5                     | 2                                               | 0.9                  | 0.15                 |                                       |                                 |                        |        |        |
| 2018 | <a href="https://doi.org/10.1016/j.electacta.2018.09.148">https://doi.org/10.1016/j.electacta.2018.09.148</a> |         | -F, -OH/-O  | Ti3C2/Ni2CO3(OH)2                                   | 695.2             | 173.8                        |                                                      |                                           |                             | KOH                                                                                                                              | 7.61                                                        | 20.5                                                       | 6                             | 20               | 1                     | 4                                               | 0.6                  |                      |                                       |                                 |                        |        |        |
| 2014 | <a href="https://doi.org/10.1016/j.elecom.2014.07.026">https://doi.org/10.1016/j.elecom.2014.07.026</a>       |         |             | Ti3C2                                               | 35.2              | 8.8                          |                                                      |                                           |                             | KOH                                                                                                                              | 7.61                                                        | 20.5                                                       | 6                             | 20               | 1                     | 3                                               | 0.6                  |                      |                                       |                                 |                        |        |        |
|      |                                                                                                               |         |             | Exfoliated by HF (ex-Ti3C2)                         | 317.4             | 264.5                        |                                                      |                                           |                             | 1 M LiPF6 in a mixture of ethylene carbonate (EC)/dimethyl carbonate (DMC) /ethylmethyl carbonate (EMC) in a 1:1:1 volume ratio. |                                                             |                                                            |                               |                  |                       | 3                                               |                      |                      |                                       |                                 |                        |        |        |
| 2014 | <a href="https://doi.org/10.1016/j.elecom.2014.09.002">https://doi.org/10.1016/j.elecom.2014.09.002</a>       |         | -OH/-O/-F   | intercalated with DMSO after exfoliation (in-Ti3C2) |                   |                              |                                                      | 123.6                                     |                             |                                                                                                                                  |                                                             |                                                            |                               |                  |                       |                                                 |                      |                      |                                       |                                 |                        |        |        |
|      |                                                                                                               |         |             | Ti3C2-intercalated with KOH                         | 350               |                              |                                                      | 98                                        |                             | H2SO4                                                                                                                            | 36.2                                                        | 8.27                                                       | 1                             | 1                | 5                     | 3                                               | 0.6                  |                      | 1.37                                  |                                 |                        |        |        |
|      |                                                                                                               |         |             | Ti3C2-intercalated with Potassium acetate           | 230               |                              |                                                      |                                           |                             | H2SO4                                                                                                                            | 36.2                                                        | 8.27                                                       | 1                             | 1                |                       | 3                                               | 0.6                  |                      | 1.51                                  |                                 |                        |        |        |
| 2018 | <a href="https://doi.org/10.1016/j.ceramint.2018.08.096">https://doi.org/10.1016/j.ceramint.2018.08.096</a>   |         |             | Ti3C2Tx<br>Ti3C2/MnO2                               | 88<br>254         |                              |                                                      | 88.6                                      |                             | H2SO4<br>KOH                                                                                                                     | 36.2<br>7.61                                                | 8.27<br>20.5                                               | 1<br>6                        | 1<br>50          | 0.5                   | 3                                               | 0.6<br>0.5           |                      | 0.79                                  |                                 |                        |        |        |
| 2019 | <a href="https://doi.org/10.1016/j.ceramint.2019.01.016">https://doi.org/10.1016/j.ceramint.2019.01.016</a>   |         |             | Ti3C2                                               | 47                |                              |                                                      |                                           |                             | KOH                                                                                                                              | 7.61                                                        | 20.5                                                       | 6                             | 50               | 0.5                   |                                                 | 3                    | 0.55                 |                                       |                                 |                        |        |        |
|      |                                                                                                               |         |             | Ti3C2/polypropylene composites                      |                   |                              |                                                      |                                           |                             |                                                                                                                                  |                                                             |                                                            |                               |                  |                       |                                                 |                      |                      |                                       |                                 |                        |        |        |
|      |                                                                                                               |         |             | Ti3C2                                               | 133.91            |                              |                                                      |                                           |                             | Na2SO4                                                                                                                           | 5.2                                                         | 8.27                                                       | 1                             | 2                |                       | 3                                               | 0.55                 |                      |                                       |                                 |                        |        |        |
|      |                                                                                                               |         |             | Ti3C2/PPy-1                                         | 156.64            |                              |                                                      |                                           | Na2SO4                      | 5.2                                                                                                                              | 8.27                                                        | 1                                                          | 2                             |                  | 3                     | 0.55                                            |                      |                      |                                       |                                 |                        | 1.0234 |        |
|      |                                                                                                               |         |             | Ti3C2/PPy-2                                         | 184.36            |                              |                                                      |                                           | Na2SO4                      | 5.2                                                                                                                              | 8.27                                                        | 1                                                          | 2                             |                  | 3                     | 0.55                                            |                      |                      |                                       |                                 |                        |        | 0.5117 |
|      |                                                                                                               |         |             | Ti3C2/PPy-3                                         | 159.57            |                              |                                                      |                                           |                             | Na2SO4                                                                                                                           | 5.2                                                         | 8.27                                                       | 1                             | 2                |                       | 3                                               | 0.55                 |                      |                                       |                                 |                        | 0.2559 |        |
|      |                                                                                                               |         |             | Ti3C2/PPy-4                                         | 135.69            |                              |                                                      |                                           |                             | Na2SO4                                                                                                                           | 5.2                                                         | 8.27                                                       | 1                             | 2                |                       | 3                                               | 0.55                 |                      |                                       |                                 |                        | 0.1279 |        |
|      |                                                                                                               |         |             | Ti3C2/PPy-5                                         | 132.87            |                              |                                                      |                                           |                             | Na2SO4                                                                                                                           | 5.2                                                         | 8.27                                                       | 1                             | 2                |                       | 3                                               | 0.55                 |                      |                                       |                                 |                        | 0.0639 |        |
|      |                                                                                                               |         |             | Ti3C2                                               | 112.02            |                              |                                                      |                                           |                             | Na2SO4                                                                                                                           | 5.2                                                         | 8.27                                                       | 1                             | 5                |                       | 3                                               | 0.55                 |                      |                                       |                                 |                        | 0.5117 |        |
|      |                                                                                                               |         |             | Ti3C2/PPy-1                                         | 132.32            |                              |                                                      |                                           |                             | Na2SO4                                                                                                                           | 5.2                                                         | 8.27                                                       | 1                             | 5                |                       | 3                                               | 0.55                 |                      |                                       |                                 |                        | 1.0234 |        |
|      |                                                                                                               |         |             | Ti3C2/PPy-2                                         | 149.1             |                              |                                                      |                                           |                             | Na2SO4                                                                                                                           | 5.2                                                         | 8.27                                                       | 1                             | 5                |                       | 3                                               | 0.55                 |                      |                                       |                                 |                        | 0.2559 |        |
|      |                                                                                                               |         |             | Ti3C2/PPy-3                                         | 128.63            |                              |                                                      |                                           |                             | Na2SO4                                                                                                                           | 5.2                                                         | 8.27                                                       | 1                             | 5                |                       | 3                                               | 0.55                 |                      |                                       |                                 |                        | 0.1279 |        |
|      |                                                                                                               |         |             | Ti3C2/PPy-4                                         | 116.87            |                              |                                                      |                                           |                             | Na2SO4                                                                                                                           | 5.2                                                         | 8.27                                                       | 1                             | 5                |                       | 3                                               | 0.55                 |                      |                                       |                                 |                        | 0.0639 |        |
|      |                                                                                                               |         |             | Ti3C2/PPy-5                                         | 108.15            |                              |                                                      |                                           |                             | Na2SO4                                                                                                                           | 5.2                                                         | 8.27                                                       | 1                             | 5                |                       | 3                                               | 0.55                 |                      |                                       |                                 |                        | 0.0639 |        |
|      |                                                                                                               |         |             | Ti3C2                                               | 105.43            |                              |                                                      |                                           |                             | Na2SO4                                                                                                                           | 5.2                                                         | 8.27                                                       | 1                             | 10               |                       | 3                                               | 0.55                 |                      |                                       |                                 |                        | 1.0234 |        |
|      |                                                                                                               |         |             | Ti3C2/PPy-1                                         | 121.77            |                              |                                                      |                                           |                             | Na2SO4                                                                                                                           | 5.2                                                         | 8.27                                                       | 1                             | 10               |                       | 3                                               | 0.55                 |                      |                                       |                                 |                        | 0.5117 |        |
|      |                                                                                                               |         |             | Ti3C2/PPy-2                                         | 138.79            |                              |                                                      |                                           |                             | Na2SO4                                                                                                                           | 5.2                                                         | 8.27                                                       | 1                             | 10               |                       | 3                                               | 0.55                 |                      |                                       |                                 |                        | 0.2559 |        |
|      |                                                                                                               |         |             | Ti3C2/PPy-3                                         | 120.11            |                              |                                                      |                                           |                             | Na2SO4                                                                                                                           | 5.2                                                         | 8.27                                                       | 1                             | 10               |                       | 3                                               | 0.55                 |                      |                                       |                                 |                        | 0.1279 |        |
|      |                                                                                                               |         |             | Ti3C2/PPy-4                                         | 108.25            |                              |                                                      |                                           |                             | Na2SO4                                                                                                                           | 5.2                                                         | 8.27                                                       | 1                             | 10               |                       | 3                                               | 0.55                 |                      |                                       |                                 |                        | 0.0639 |        |
|      |                                                                                                               |         |             | Ti3C2/PPy-5                                         | 98.79             |                              |                                                      |                                           |                             | Na2SO4                                                                                                                           | 5.2                                                         | 8.27                                                       | 1                             | 10               |                       | 3                                               | 0.55                 |                      |                                       |                                 |                        | 0.0639 |        |
|      |                                                                                                               |         |             | Ti3C2                                               | 99.48             |                              |                                                      |                                           |                             | Na2SO4                                                                                                                           | 5.2                                                         | 8.27                                                       | 1                             | 20               |                       | 3                                               | 0.55                 |                      |                                       |                                 |                        | 1.0234 |        |
|      |                                                                                                               |         |             | Ti3C2/PPy-1                                         | 112.78            |                              |                                                      |                                           |                             | Na2SO4                                                                                                                           | 5.2                                                         | 8.27                                                       | 1                             | 20               |                       | 3                                               | 0.55                 |                      |                                       |                                 |                        | 0.5117 |        |
|      |                                                                                                               |         |             | Ti3C2/PPy-2                                         | 129.75            |                              |                                                      |                                           |                             | Na2SO4                                                                                                                           | 5.2                                                         | 8.27                                                       | 1                             | 20               |                       | 3                                               | 0.55                 |                      |                                       |                                 |                        | 0.2559 |        |
|      |                                                                                                               |         |             | Ti3C2/PPy-3                                         | 112.96            |                              |                                                      |                                           |                             | Na2SO4                                                                                                                           | 5.2                                                         | 8.27                                                       | 1                             | 20               |                       | 3                                               | 0.55                 |                      |                                       |                                 |                        | 0.1279 |        |
|      |                                                                                                               |         |             | Ti3C2/PPy-4                                         | 100.19            |                              |                                                      |                                           |                             | Na2SO4                                                                                                                           | 5.2                                                         | 8.27                                                       | 1                             | 20               |                       | 3                                               | 0.55                 |                      |                                       |                                 |                        | 0.0639 |        |
|      |                                                                                                               |         |             | Ti3C2/PPy-5                                         | 87.57             |                              |                                                      |                                           |                             | Na2SO4                                                                                                                           | 5.2                                                         | 8.27                                                       | 1                             | 20               |                       | 3                                               | 0.55                 |                      |                                       |                                 |                        | 0.0639 |        |
|      |                                                                                                               |         |             | Ti3C2                                               | 90.21             |                              |                                                      |                                           |                             | Na2SO4                                                                                                                           | 5.2                                                         | 8.27                                                       | 1                             | 50               |                       | 3                                               | 0.55                 |                      |                                       |                                 |                        |        |        |
|      |                                                                                                               |         |             | Ti3C2/PPy-1                                         | 98.61             |                              |                                                      |                                           |                             | Na2SO4                                                                                                                           | 5.2                                                         | 8.27                                                       | 1                             | 50               |                       | 3                                               | 0.55                 |                      |                                       |                                 |                        | 1.0234 |        |
|      |                                                                                                               |         |             | Ti3C2/PPy-2                                         | 117.97            |                              |                                                      |                                           |                             | Na2SO4                                                                                                                           | 5.2                                                         | 8.27                                                       | 1                             | 50               |                       | 3                                               | 0.55                 |                      |                                       |                                 |                        | 0.5117 |        |
|      |                                                                                                               |         |             | Ti3C2/PPy-3                                         | 102.28            |                              |                                                      |                                           |                             | Na2SO4                                                                                                                           | 5.2                                                         | 8.27                                                       | 1                             | 50               |                       | 3                                               | 0.55                 |                      |                                       |                                 |                        | 0.2559 |        |
|      |                                                                                                               |         |             | Ti3C2/PPy-4                                         | 88.39             |                              |                                                      |                                           |                             | Na2SO4                                                                                                                           | 5.2                                                         | 8.27                                                       | 1                             | 50               |                       | 3                                               | 0.55                 |                      |                                       |                                 |                        | 0.1279 |        |
|      |                                                                                                               |         |             | Ti3C2/PPy-5                                         | 74.86             |                              |                                                      |                                           |                             | Na2SO4                                                                                                                           | 5.2                                                         | 8.27                                                       | 1                             | 50               |                       | 3                                               | 0.55                 |                      |                                       |                                 |                        | 0.0639 |        |
|      |                                                                                                               |         |             | Ti3C2                                               | 80.08             |                              |                                                      |                                           |                             | Na2SO4                                                                                                                           | 5.2                                                         | 8.27                                                       | 1                             | 100              |                       | 3                                               | 0.55                 |                      |                                       |                                 |                        |        |        |
|      |                                                                                                               |         |             | Ti3C2/PPy-1                                         | 83.18             |                              |                                                      |                                           |                             | Na2SO4                                                                                                                           | 5.2                                                         | 8.27                                                       | 1                             | 100              |                       | 3                                               | 0.55                 |                      |                                       |                                 |                        | 1.0234 |        |
|      |                                                                                                               |         |             | Ti3C2/PPy-2                                         | 104.51            |                              |                                                      |                                           |                             | Na2SO4                                                                                                                           | 5.2                                                         | 8.27                                                       | 1                             | 100              |                       | 3                                               | 0.55                 |                      |                                       |                                 |                        | 0.5117 |        |
|      |                                                                                                               |         |             | Ti3C2/PPy-3                                         | 90.73             |                              |                                                      |                                           |                             | Na2SO4                                                                                                                           | 5.2                                                         | 8.27                                                       | 1                             | 100              |                       | 3                                               | 0.55                 |                      |                                       |                                 |                        | 0.2559 |        |
|      |                                                                                                               |         |             | Ti3C2/PPy-4                                         | 82.22             |                              |                                                      |                                           |                             | Na2SO4                                                                                                                           | 5.2                                                         | 8.27                                                       | 1                             | 100              |                       | 3                                               | 0.55                 |                      |                                       |                                 |                        | 0.1279 |        |
|      |                                                                                                               |         |             | Ti3C2/PPy-5                                         | 62.13             |                              |                                                      |                                           |                             | Na2SO4                                                                                                                           | 5.2                                                         | 8.27                                                       | 1                             | 100              |                       | 3                                               | 0.55                 |                      |                                       |                                 |                        | 0.0639 |        |
| 2021 | <a href="https://doi.org/10.1016/j.elecom.2020.148272">https://doi.org/10.1016/j.elecom.2020.148272</a>       |         |             | N-Ti3C2/NiCo2S4                                     | 1849              |                              |                                                      |                                           |                             | KOH                                                                                                                              | 7.61                                                        | 20.5                                                       | 3                             | 2                |                       | 3                                               | 0.5                  |                      |                                       |                                 |                        |        |        |
|      |                                                                                                               |         |             |                                                     |                   |                              |                                                      |                                           |                             |                                                                                                                                  |                                                             |                                                            |                               |                  |                       |                                                 |                      |                      |                                       |                                 |                        |        |        |
|      |                                                                                                               |         |             | N-Ti3C2/NiCo2S4                                     | 1697              |                              |                                                      |                                           |                             | KOH                                                                                                                              | 7.61                                                        | 20.5                                                       | 3                             | 5                |                       | 3                                               | 0.5                  |                      |                                       |                                 |                        |        |        |
|      |                                                                                                               |         |             | N-Ti3C2/NiCo2S4                                     | 1611              |                              |                                                      |                                           |                             | KOH                                                                                                                              | 7.61                                                        | 20.5                                                       | 3                             | 10               |                       | 3                                               | 0.5                  |                      |                                       |                                 |                        |        |        |
|      |                                                                                                               |         |             | N-Ti3C2/NiCo2S4                                     | 1418              |                              |                                                      |                                           |                             | KOH                                                                                                                              | 7.61                                                        | 20.5                                                       | 3                             | 20               |                       | 3                                               | 0.5                  |                      |                                       |                                 |                        |        |        |
|      |                                                                                                               |         |             | N-Ti3C2/NiCo2S4                                     | 1045              |                              |                                                      |                                           |                             | KOH                                                                                                                              | 7.61                                                        | 20.5                                                       | 3                             | 40               |                       | 3                                               | 0.5                  |                      |                                       |                                 |                        |        |        |
|      |                                                                                                               |         |             | N-Ti3C2/NiCo2S4                                     | 254               |                              |                                                      |                                           |                             | KOH                                                                                                                              | 7.61                                                        | 20.5                                                       | 3                             |                  | 0.5                   | 3                                               | 0.5                  |                      |                                       |                                 |                        |        |        |
|      |                                                                                                               |         |             | N-Ti3C2/NiCo2S4                                     | 282.5             |                              |                                                      |                                           |                             | KOH                                                                                                                              | 7.61                                                        | 20.5                                                       | 3                             |                  | 1                     | 3                                               | 0.5                  |                      |                                       |                                 |                        |        |        |

| Year | DOI                                                                                                       | Remarks                                                                                                                                        | Termination | Material                                                                                                                   | Capacitance (F/g)               | Specific Capacitance (mAh/g) | Volumetric Specific Capacitance (F/cm <sup>3</sup> ) | Specific surface area (m <sup>2</sup> /g) | Percentages of Terminations | Electrolyte Chemical Formula                          | Cation ion mobility (cm <sup>2</sup> /Vs) x10 <sup>-4</sup> | Anion ion mobility (cm <sup>2</sup> /Vs) x10 <sup>-4</sup> | Electrolyte Concentration (M) | Scan Rate (mV/s)          | Current Density (A/g)   | Cell Configuration (three two electrode system) | Potential Window (V)     | Sheet thickness (mm)                        | Density of sheet (g/cm <sup>3</sup> ) | Intercalation( charge per gram) | wt% Ti3C2 in electrode |                   |                              |            |                              |
|------|-----------------------------------------------------------------------------------------------------------|------------------------------------------------------------------------------------------------------------------------------------------------|-------------|----------------------------------------------------------------------------------------------------------------------------|---------------------------------|------------------------------|------------------------------------------------------|-------------------------------------------|-----------------------------|-------------------------------------------------------|-------------------------------------------------------------|------------------------------------------------------------|-------------------------------|---------------------------|-------------------------|-------------------------------------------------|--------------------------|---------------------------------------------|---------------------------------------|---------------------------------|------------------------|-------------------|------------------------------|------------|------------------------------|
| 2022 | <a href="https://doi.org/10.1007/s13391-022-00337-9">https://doi.org/10.1007/s13391-022-00337-9</a>       | Review paper. Citing the next 2 papers                                                                                                         |             |                                                                                                                            |                                 |                              |                                                      |                                           |                             |                                                       |                                                             |                                                            |                               |                           |                         |                                                 |                          |                                             |                                       |                                 |                        |                   |                              |            |                              |
| 2020 | <a href="https://doi.org/10.1039/D0TA00687D">https://doi.org/10.1039/D0TA00687D</a>                       |                                                                                                                                                |             | Ti3C2Tx flakes layered with organic photovoltaics                                                                          | 502                             |                              | 450                                                  |                                           |                             | Solid organic ionogel                                 |                                                             |                                                            |                               | 1                         |                         |                                                 |                          |                                             |                                       |                                 |                        |                   |                              |            |                              |
| 2018 | <a href="https://doi.org/10.1021/acsnano.8b02908">https://doi.org/10.1021/acsnano.8b02908</a>             |                                                                                                                                                |             | Ti3C2Tx (5 μm thick) /elastomer composites stretched to:                                                                   | 118<br>117<br>108               |                              | 395<br>390<br>362                                    |                                           |                             | Solid organic ionogel                                 |                                                             |                                                            |                               | 2                         |                         |                                                 |                          |                                             |                                       |                                 |                        |                   |                              |            |                              |
| 2022 | <a href="https://doi.org/10.1002/psm2.1130">https://doi.org/10.1002/psm2.1130</a>                         | Review paper:                                                                                                                                  |             |                                                                                                                            |                                 |                              |                                                      |                                           |                             |                                                       |                                                             |                                                            |                               |                           |                         |                                                 |                          |                                             |                                       |                                 |                        |                   |                              |            |                              |
| 2021 | <a href="https://doi.org/10.1016/j.nanosci.2021.143710">https://doi.org/10.1016/j.nanosci.2021.143710</a> | Ti3C2Tx MXene/carbon nanofiber by electrospinning                                                                                              |             | Small-sized mxene sheets (SMX/C)                                                                                           | 120                             |                              |                                                      |                                           |                             | H2SO4                                                 | 36.2                                                        | 8.27                                                       | 1                             | 5                         |                         | 3                                               | 0.7                      | 0.00075                                     |                                       |                                 |                        |                   |                              |            |                              |
|      |                                                                                                           | To investigate the effects of MXene sheet size the MXene/CF hybrid, the freestanding hybrid cut and assembled into a symmetric supercapacitor. |             | Medium-sized mxene sheets (MMX/C)                                                                                          | 113                             |                              |                                                      |                                           |                             | H2SO4                                                 | 36.2                                                        | 8.27                                                       | 1                             | 5                         |                         | 3                                               | 0.7                      | 0.0025                                      |                                       |                                 |                        |                   |                              |            |                              |
|      |                                                                                                           |                                                                                                                                                |             | Large-sized mxene sheets (LMX/C)                                                                                           | 106                             |                              |                                                      |                                           |                             | H2SO4                                                 | 36.2                                                        | 8.27                                                       | 1                             | 5                         |                         | 3                                               | 0.7                      | 0.007                                       |                                       |                                 |                        |                   |                              |            |                              |
|      |                                                                                                           |                                                                                                                                                |             | Small-sized mxene sheets (SMX/C)                                                                                           | 90                              |                              |                                                      |                                           |                             | H2SO4                                                 | 36.2                                                        | 8.27                                                       | 1                             | 300                       |                         | 3                                               | 0.7                      | 0.00075                                     |                                       |                                 |                        |                   |                              |            |                              |
|      |                                                                                                           |                                                                                                                                                |             | Medium-sized mxene sheets (MMX/C)                                                                                          | 69                              |                              |                                                      |                                           |                             | H2SO4                                                 | 36.2                                                        | 8.27                                                       | 1                             | 300                       |                         | 3                                               | 0.7                      | 0.0025                                      |                                       |                                 |                        |                   |                              |            |                              |
|      |                                                                                                           |                                                                                                                                                |             | Large-sized mxene sheets (LMX/C)                                                                                           | 51                              |                              |                                                      |                                           |                             | H2SO4                                                 | 36.2                                                        | 8.27                                                       | 1                             | 300                       |                         | 3                                               | 0.7                      | 0.007                                       |                                       |                                 |                        |                   |                              |            |                              |
| 2020 | <a href="https://doi.org/10.1016/j.nanoen.2020.104971">https://doi.org/10.1016/j.nanoen.2020.104971</a>   |                                                                                                                                                |             | Small-sized mxene sheets (SMX/C) flexible and asymmetric pseudocapacitor using a Ti3C2Tx/MXene film with wavy architecture | 76<br>340                       |                              | 1293                                                 |                                           |                             | H2SO4<br>H2SO4                                        | 36.2<br>36.2                                                | 8.27<br>8.27                                               | 1<br>3                        | 100<br>10                 |                         | 3<br>2                                          | 0.7<br>0.85              | 0.00075<br>0.006                            | 3.8                                   |                                 |                        |                   |                              |            |                              |
| 2017 | <a href="https://doi.org/10.1038/nenergy.2017.105">https://doi.org/10.1038/nenergy.2017.105</a>           |                                                                                                                                                |             | Ti3 C2 O0.84(F) (OH)0.06(2) F0.25(8)                                                                                       | 299<br>208<br>450<br>380<br>370 |                              | 1136<br>790                                          |                                           |                             | H2SO4<br>H2SO4<br>H2SO4<br>H2SO4                      | 36.2<br>36.2<br>36.2<br>36.2                                | 8.27<br>8.27<br>8.27<br>8.27                               | 3<br>3<br>3<br>3              | 1000<br>5000<br>100<br>2  |                         | 2<br>2<br>2<br>2                                | 0.85<br>0.85<br>1<br>1   | 0.006<br>0.006<br>0.00009<br>0.003<br>0.013 | 3.8<br>3.8                            |                                 |                        |                   |                              |            |                              |
|      |                                                                                                           |                                                                                                                                                |             | templating macroporous MXene flakes with polymethyl methacrylate (PMMA) microspheres                                       | 310                             |                              |                                                      |                                           |                             | H2SO4                                                 | 36.2                                                        | 8.27                                                       | 3                             | 10                        |                         | 2<br>2                                          | 1<br>1                   | 0.013                                       |                                       |                                 |                        |                   |                              |            |                              |
|      |                                                                                                           |                                                                                                                                                |             |                                                                                                                            | 210                             |                              |                                                      |                                           |                             | H2SO4                                                 | 36.2                                                        | 8.27                                                       | 3                             | 10000                     |                         |                                                 | 1                        | 0.013                                       |                                       |                                 |                        |                   |                              |            |                              |
| 2019 | <a href="https://doi.org/10.1038/s41560-019-0339-9">https://doi.org/10.1038/s41560-019-0339-9</a>         | Ti3C2 electrodes tested in three 1M LITFSI organic electrolytes with different solvents                                                        |             | DMSO                                                                                                                       | 100<br>130                      |                              |                                                      |                                           |                             | H2SO4<br>H2SO4                                        | 36.2<br>36.2                                                | 8.27<br>8.27                                               | 3<br>1                        | 40000<br>2                |                         | 3<br>1                                          | 1<br>2.1                 | 0.013                                       |                                       | 0.46                            |                        |                   |                              |            |                              |
|      |                                                                                                           |                                                                                                                                                |             | acetonitrile (ACN)                                                                                                         | 110                             |                              |                                                      |                                           |                             | lithium bis (trifluoromethyl sulfonyl) amine (LITFSI) |                                                             |                                                            | 1                             | 2                         |                         | 3                                               | 2.2                      |                                             |                                       | 0.37                            |                        |                   |                              |            |                              |
|      |                                                                                                           |                                                                                                                                                |             | propylene carbonate (PC)                                                                                                   | 195                             |                              |                                                      |                                           |                             | lithium bis (trifluoromethyl sulfonyl) amine (LITFSI) |                                                             |                                                            | 1                             | 2                         |                         | 3                                               | 2.4                      |                                             |                                       | 0.93                            |                        |                   |                              |            |                              |
| 2014 | <a href="https://doi.org/10.1038/nature13970">https://doi.org/10.1038/nature13970</a>                     |                                                                                                                                                |             | Ti3C2Tx Clay                                                                                                               | 245                             |                              |                                                      |                                           |                             | lithium bis (trifluoromethyl sulfonyl) amine (LITFSI) | 36.2                                                        | 8.27                                                       | 1                             | 2                         |                         |                                                 | 0.6                      | 0.005                                       |                                       |                                 |                        |                   |                              |            |                              |
| 2020 | <a href="https://doi.org/10.1016/j.nanoen.2020.104734">https://doi.org/10.1016/j.nanoen.2020.104734</a>   |                                                                                                                                                |             |                                                                                                                            | 35.2<br>1849<br>363.6073579     | 8.8<br>264.5<br>106.6090482  | 119.8<br>1293<br>413.5561518                         | 22.35<br>98<br>41.14236462                |                             |                                                       | 5.2<br>36.2<br>13.90473538                                  | 8.27<br>20.5<br>4.817404844                                | 1<br>6<br>1.345019213         | 1<br>40000<br>4896.335716 | 0.5<br>5<br>1.782632261 | 2<br>4<br>0.3564261874                          | 0.5<br>3<br>0.4477507472 | 0.00009<br>0.15<br>0.04566600335            | 0.79<br>3.8<br>1.431801895            | 0.37<br>0.93<br>0.300721355     |                        | min<br>max<br>std | 0.04566600335<br>4896.335716 | min<br>max | 0.02101789474<br>823.8450704 |
|      | avg                                                                                                       |                                                                                                                                                |             |                                                                                                                            | 249.1307792                     | 142.675                      | 616.975                                              | 57.825                                    |                             |                                                       | 14.63956522                                                 | 10.5742029                                                 | 1.77777778                    | 823.8450704               | 1.8                     | 2.893939394                                     | 0.7215277778             | 0.02101789474                               | 2.511666667                           | 0.586666667                     |                        |                   |                              |            |                              |
